# Supplementary material
Source: PubMed Central journal article supplement (PMC3039364)
Supplement: supp_M110.196436_jbc.M110.196436-1.pdf [file supp_M110.196436_jbc.M110.196436-1.pdf]

| G-protein<br>(residues)           | Sequence (residues 263-289) |                                |                 |
|-----------------------------------|-----------------------------|--------------------------------|-----------------|
|                                   | $\alpha 3$ helix            | $\alpha 3$ - $\beta 5$<br>Loop | $\beta 5$ sheet |
| $G_s\alpha$<br>(276-282)          | NRLQEALNLFKSI               | WNNRWLR                        | TISVILF         |
| $G_t\alpha$                       | <u>NRMHESLHLFNSI</u>        | <u>CNHRYFA</u>                 | <u>TTSIVLF</u>  |
| $G_s\alpha^{GtL/QL}$<br>(276-282) | NRLQEALNLFKSI               | <u>CNHRYFA</u>                 | TISVILF         |

**Supplement Table I.** Homologous regions on  $G_s\alpha$  and  $G_t\alpha$  and chimeric protein sequences are shown, and the domains are as indicated above.  $G_s\alpha^{GtL/QL}$  is a chimera of  $G_s\alpha$  and  $G_t\alpha$ , and was synthesized as described in “Experimental Procedures” using the forward primer 5’ - ctctcaagagcatctggaatcaccgctactctgccaccatctctgtgattctg - 3’, and its reverse complement as a reverse primer.

|                   |                                                                                |
|-------------------|--------------------------------------------------------------------------------|
| PN                | KQLQKDKQVYRATHR                                                                |
| PG <sub>t</sub> N | EDA EK DARVYRATVK                                                              |
| P3                | LNLFKSIWNNRWLRT                                                                |
| PG <sub>t</sub> 3 | L <u>H</u> L <u>F</u> N <u>S</u> I <u>C</u> N <u>H</u> R <u>Y</u> F <u>A</u> T |
| M1                | L <u>H</u> L <u>F</u> N <u>S</u> IWNNRWLRT                                     |
| M2                | LNLFKS <u>I</u> C <u>N</u> H <u>R</u> WLRT                                     |
| M3                | LNLFKSIWNNR <u>Y</u> F <u>A</u> T                                              |
| M5                | L <u>H</u> L <u>F</u> N <u>S</u> IWNNR <u>Y</u> F <u>A</u> T                   |
| M6                | LNLFKS <u>I</u> C <u>N</u> H <u>R</u> Y <u>F</u> A <u>T</u>                    |

**Supplement Table II.** Peptide sequences. PN and PG<sub>t</sub>N are derived from a region near N-terminal (residues 28-42) of G<sub>s</sub>α and G<sub>t</sub>α, respectively. P3 and peptide G<sub>t</sub>3 are derived from α3-β5 region (269-283) of G<sub>s</sub>α and G<sub>t</sub>α, respectively. Peptide M1, M2, M3, M5 and M6 are derivative of P3 in which some residues were replaced by their G<sub>t</sub>α homologues (underlined).

| <b>Dynamic Instability Parameters</b> | <b>Control</b> | <b>G<sub>s</sub>α<sup>WT</sup><br/>(4 μM)</b> |
|---------------------------------------|----------------|-----------------------------------------------|
| Growing Rate (μm/min)                 | 1.6 ± 0.1      | 1.6 ± 0.2                                     |
| Shortening Rate (μm/min)              | 8.9 ± 0.7      | 9 ± 0.8                                       |
| Time Growing (%)                      | 39             | 30                                            |
| Time Shortening (%)                   | 11             | 12                                            |
| Time Attenuated (%)                   | 50             | 58                                            |
| Catastrophe Freq (per min)            | 0.26 ± 0.02    | 0.28 ± 0.06                                   |
| Rescue Freq (per min)                 | 1.42 ± 0.2     | 1.40 ± 0.1                                    |
| Dynamicity                            | 1.44           | 1.40                                          |

**Supplement Table III.** Effect of G<sub>s</sub>α<sup>WT</sup> on microtubule dynamic instability parameters. Microtubule dynamic instability parameters were determined in the absence or in the presence of 4 μM G<sub>s</sub>α<sup>WT</sup>. G<sub>s</sub>α<sup>WT</sup> did not significantly alter any of the dynamics parameters. Ten microtubules were measured.

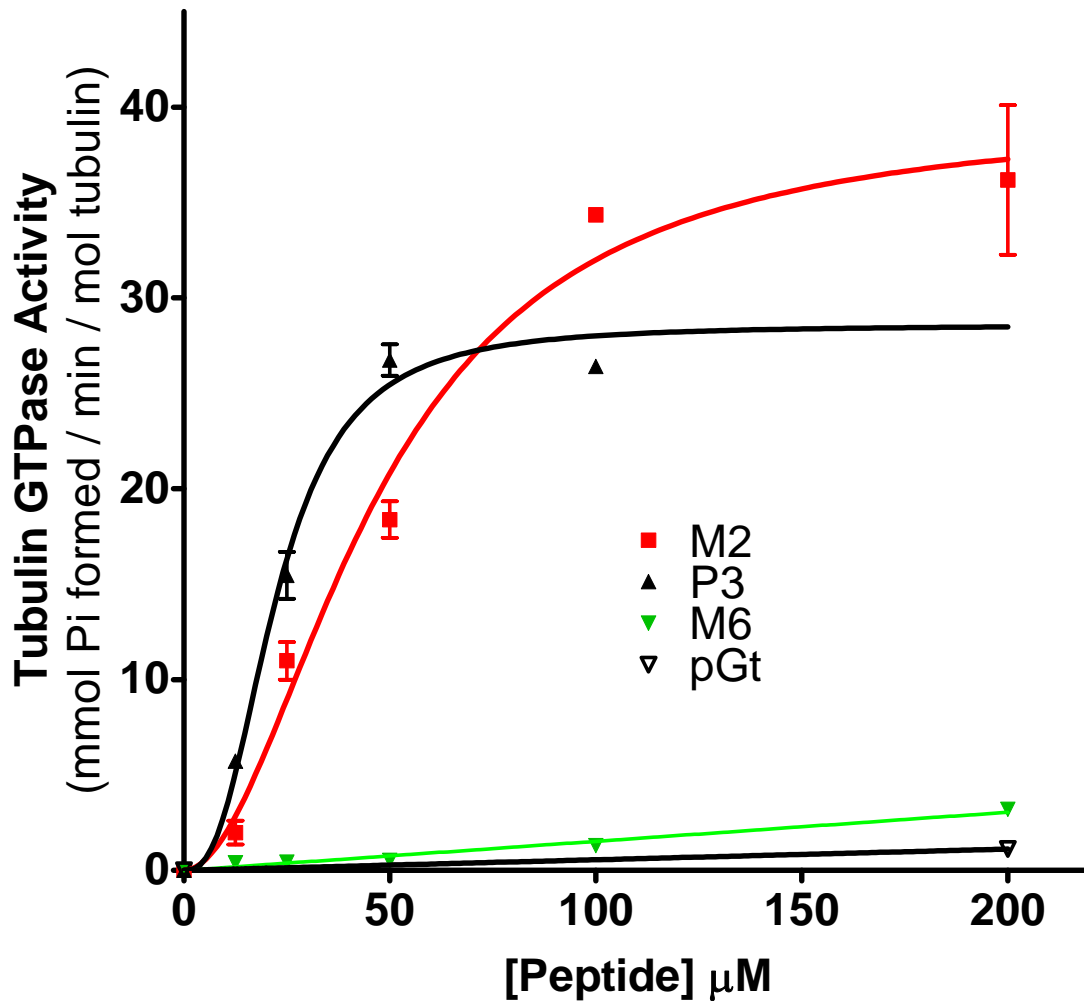

**Supplement Figure 1.** Effect of variant peptides on tubulin GTPase. Variations of peptide P3 were incubated with tubulin-GTP, and tubulin GTPase was determined. Peptides P3, M2 and M6 all bound tubulin with similar affinities. However, only peptides P3 and M2 (not M6) significantly stimulated tubulin GTPase.

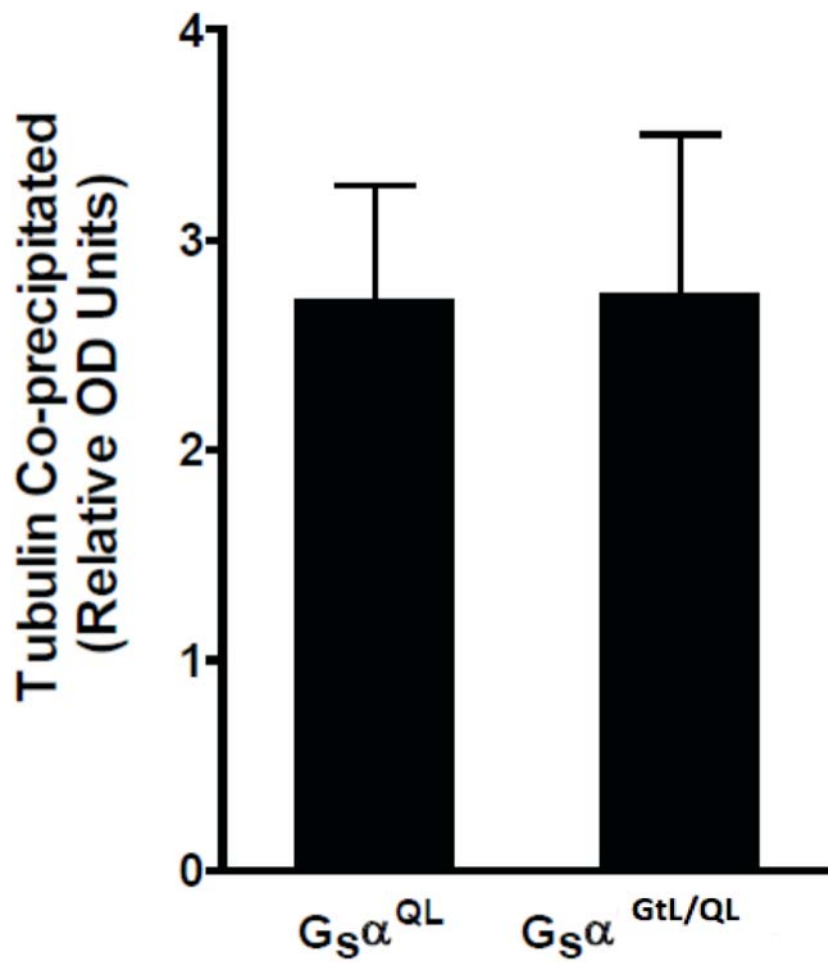

**Supplement Figure 2.** The amount of tubulin co-precipitated with either His- $G_s\alpha^{QL}$  or His- $G_s\alpha^{GtL/QL}$  was quantified on a Coomassie-stained gel, and normalized to the amount of  $G_s\alpha$  precipitated. There is no significant difference between parental  $G_s\alpha$  and the chimeric  $G_s\alpha$ , suggesting that the two proteins bind tubulin to a similar extent.
